# Supplementary material for: Grain boundaries assisting the generation of abundant Cu+ for highly selective electroreduction of CO2 to ethanol
Source: Royal Society of Chemistry journal article supplement (doi:10.1039/d3gc04475k), 2024-01-01
Supplement: d3gc04475k1.pdf [file d3gc04475k1.pdf]

## Supplementary Material

### **Grain boundaries assisting generation abundant Cu<sup>+</sup> for highly selective electro-reduction CO<sub>2</sub> to ethanol**

Xinze Bi<sup>a</sup>, Yuezhu Zhao<sup>a</sup>, Yifan Yan<sup>a</sup>, Hongzhi Wang<sup>\*,b</sup>, Mingbo Wu<sup>\*,a</sup>

a.College of New Energy, College of Chemical Engineering, State Key Laboratory of Heavy Oil Processing, China University of Petroleum (East China), Qingdao 266580, China

b.College of Chemistry and Chemical Engineering, Ocean University of China, Qingdao, 266100, China

\*Corresponding author. Email: wumb@upc.edu.cn; wanghz@ouc.edu.cn.

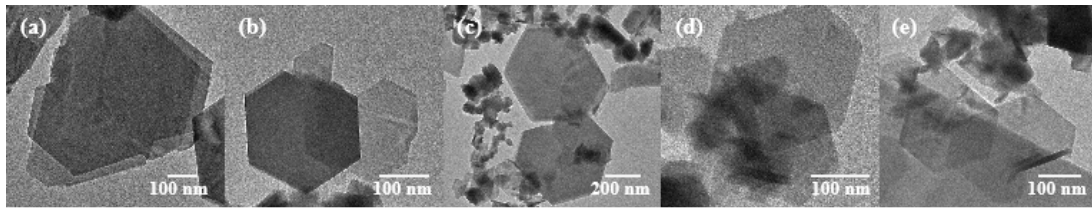

Fig. S1. (a-e) The TEM images of CuSe<sup>X</sup> (X=1, 2, 3, 4, 5), respectively.

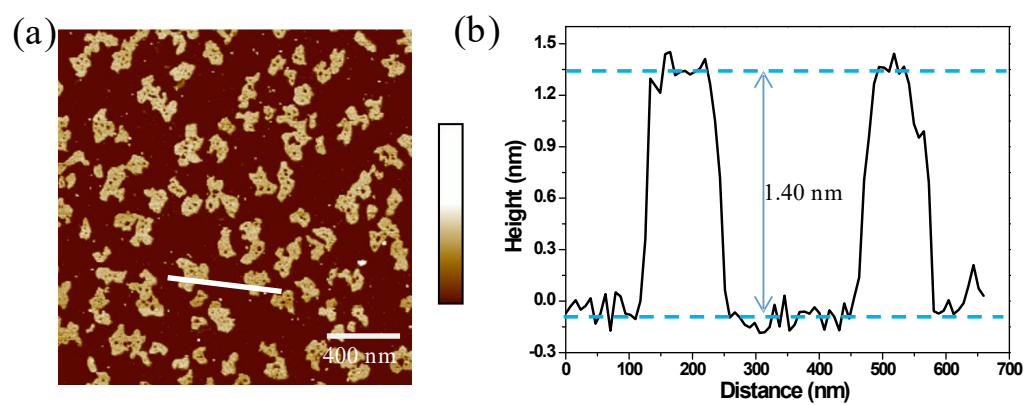

Fig. S2. (a, b) The AFM characterization of CuSe<sub>3</sub>.

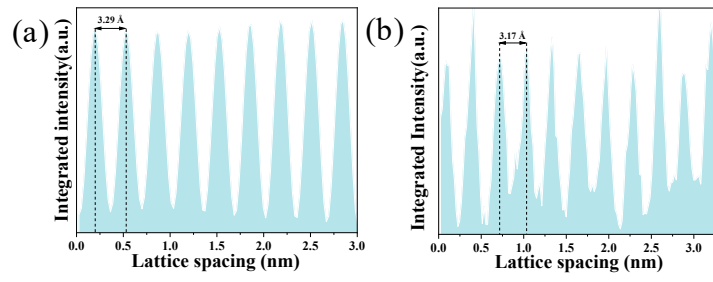

Fig. S3. The lattice spacing obtained by integrating a few atomic layers of  $\text{Cu}_7\text{Se}_4(222)$ (a) and  $\text{CuSe}(102)$ (b).

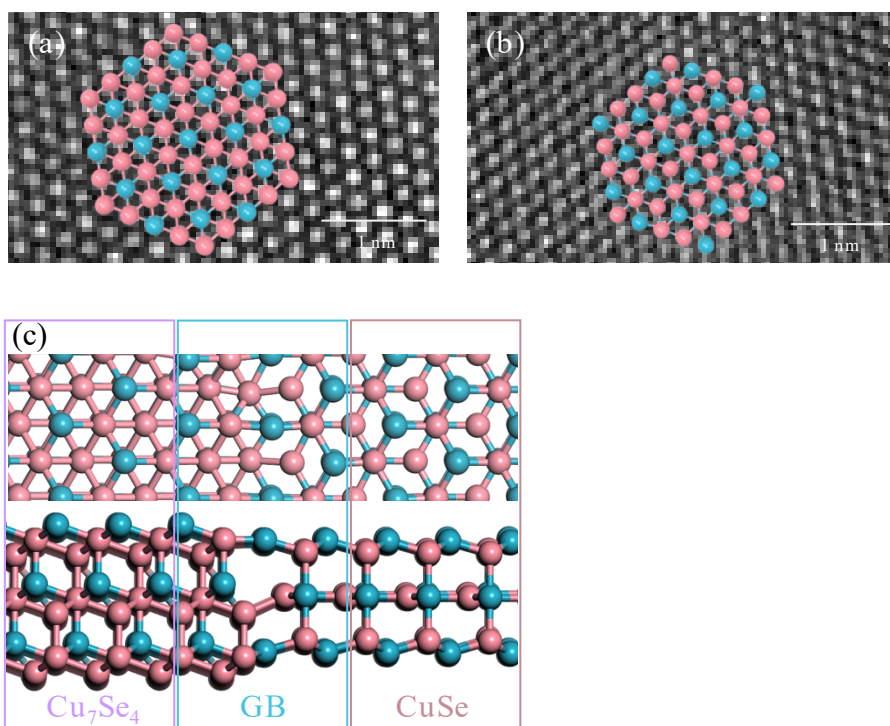

Fig. S4. The HRTEM images of  $\text{Cu}_7\text{Se}_4$ (a) and  $\text{CuSe}$ (b). (c) Top view and of front view of the model of  $\text{CuSe}^3$ .

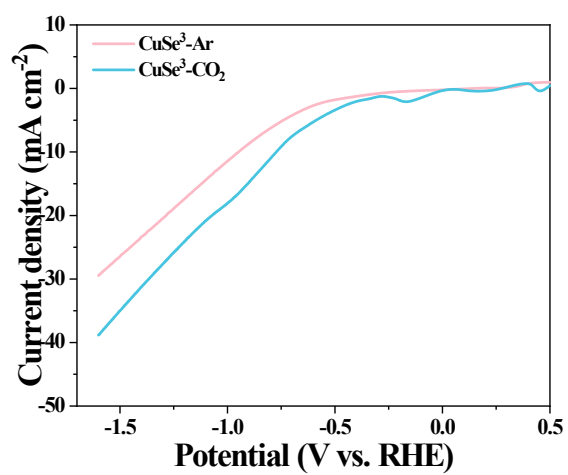

Fig. S5. Linear sweep voltammetry curves toward CO<sub>2</sub>ER at different atmospheres for CuSe<sub>3</sub>.

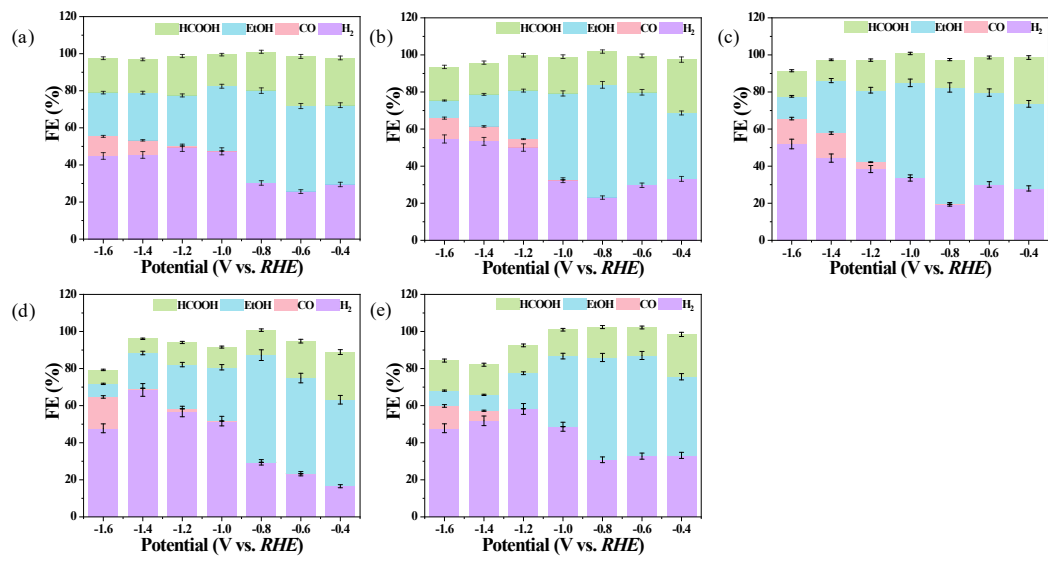

Fig. S6. (a-e) FEs and product distributions for CuSe<sup>X</sup>.

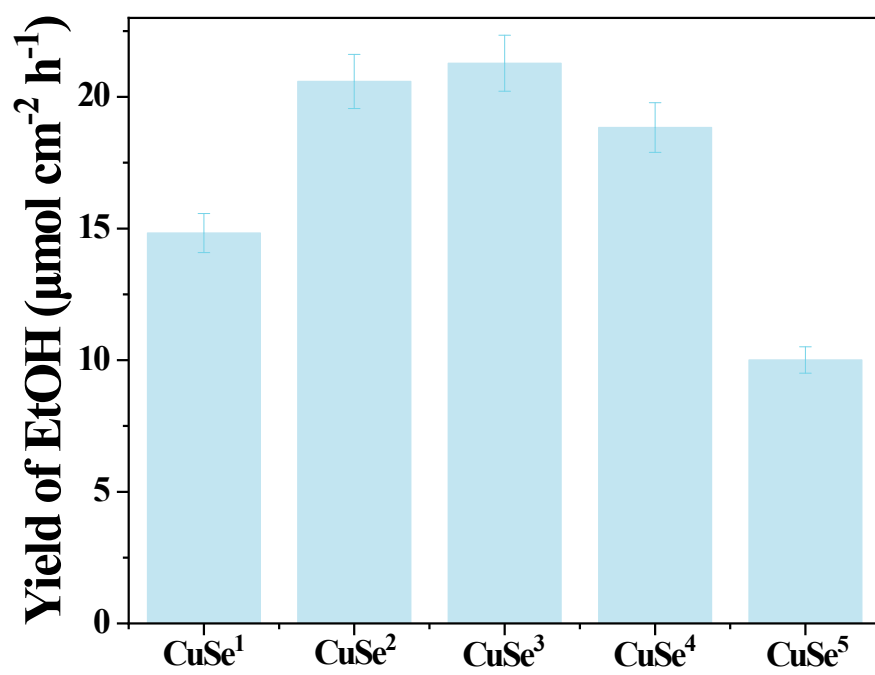

Fig. S7. Yield of EtOH for CuSe<sup>x</sup>.



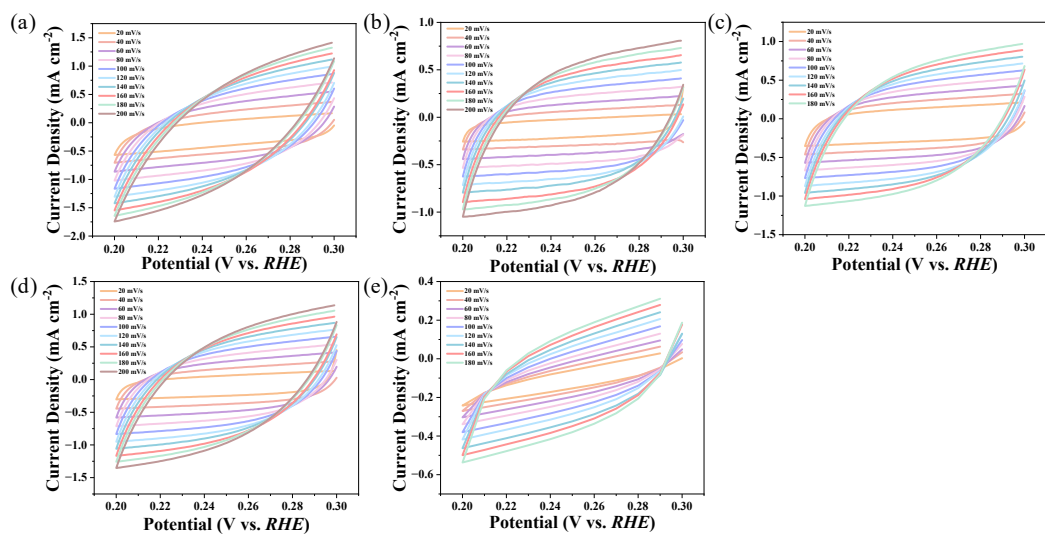

Fig. S8. (a-e) Cyclic voltammograms for CuSe<sup>X</sup>.

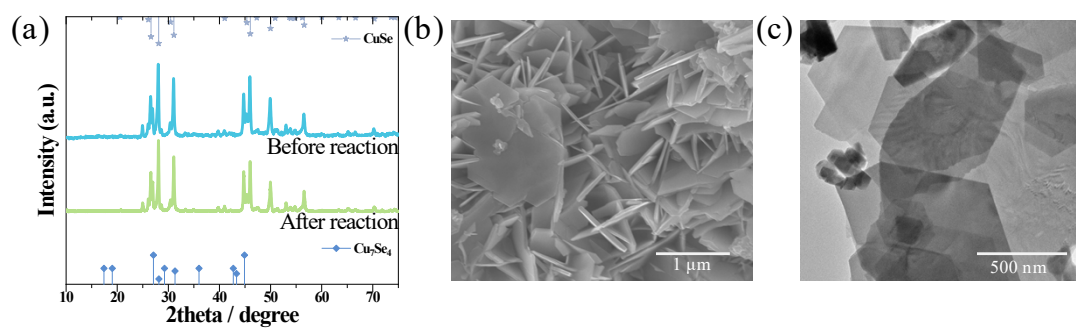

Fig. S9. (a) XRD patterns, (b) the SEM image and (c) the TEM image for CuSe<sub>3</sub> after 8 h CO<sub>2</sub>ER at -0.8 V vs. RHE.

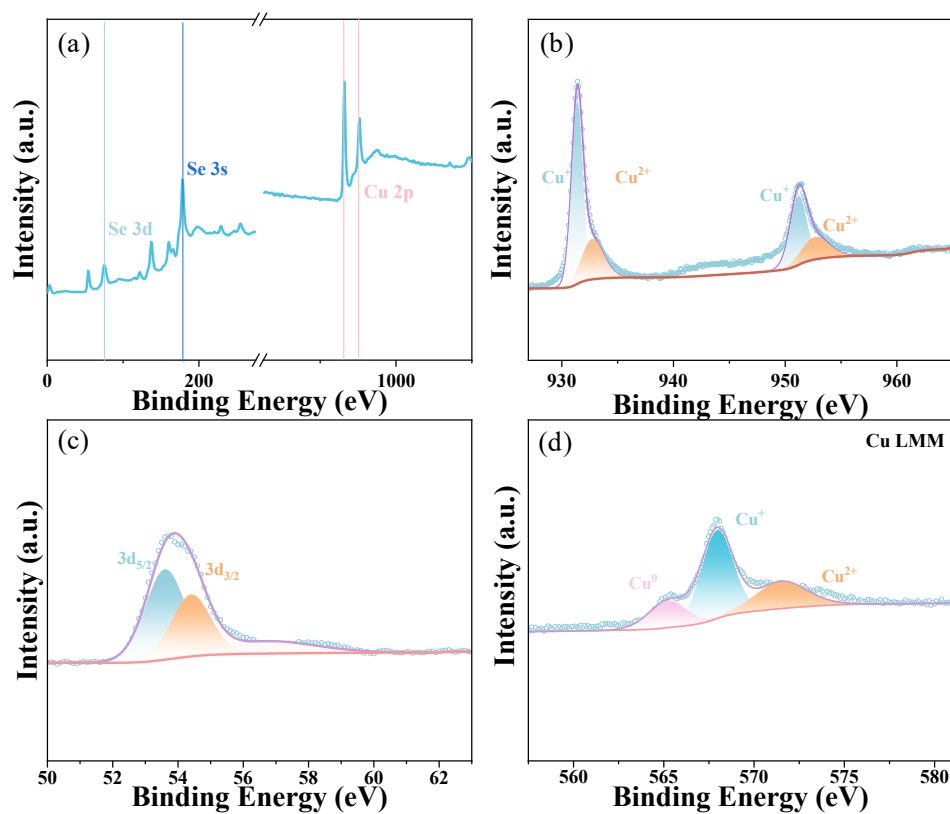

Fig. S10. (a) Total XPS curve, (b) Cu 2p XPS curve, (c) Se 3d XPS curve and (d) Cu LMM Auger spectra.

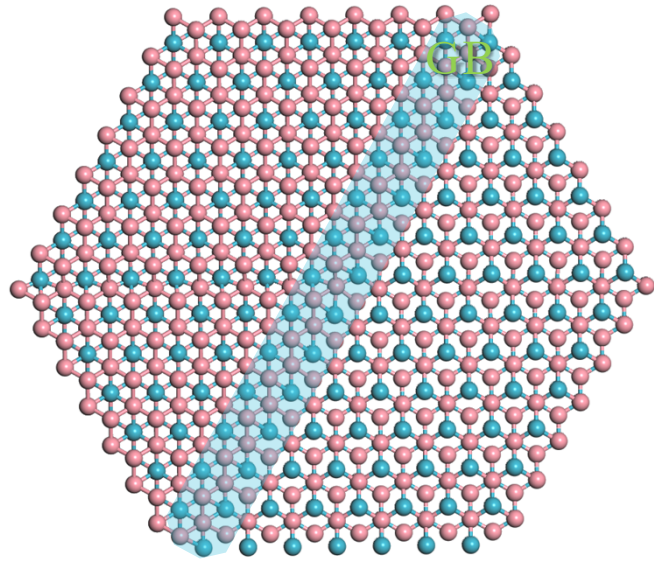

Fig. S11. The model for GB.

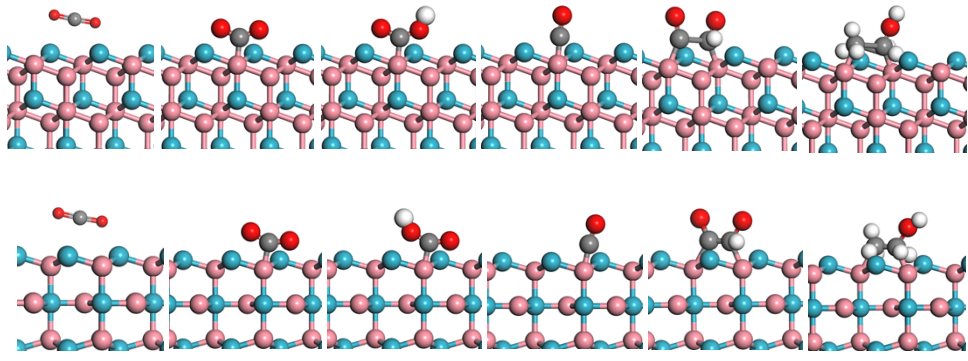

Fig. S12. The model of free energy for  $\text{Cu}_7\text{Se}_4$  and  $\text{CuSe}$ .

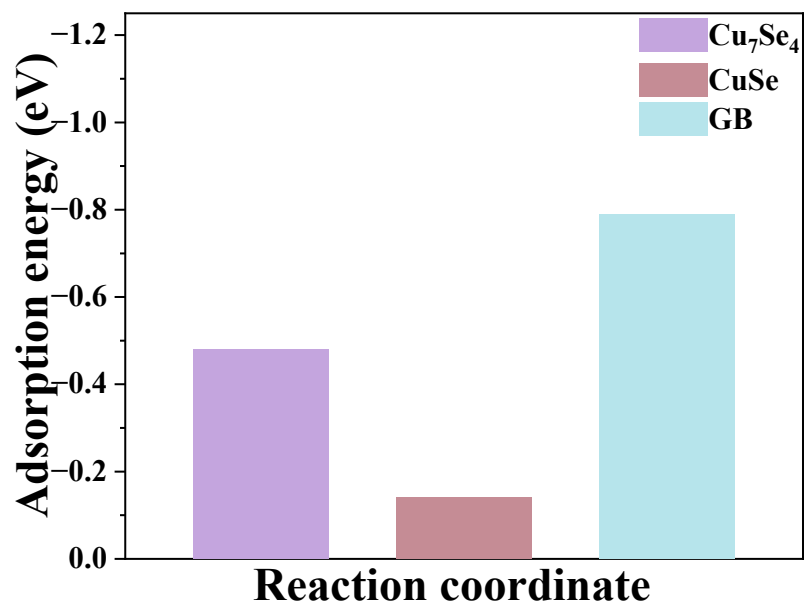

Fig. S13. Adsorption energy of \*CO intermediate on CuSe<sup>3</sup>.

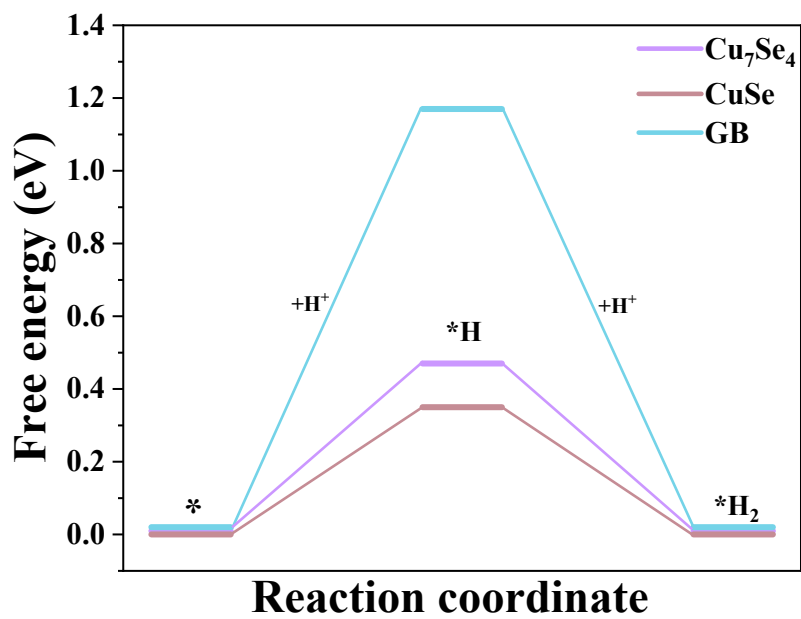

Fig. S14. Free energy diagram for H<sub>2</sub> on CuSe<sub>3</sub>.

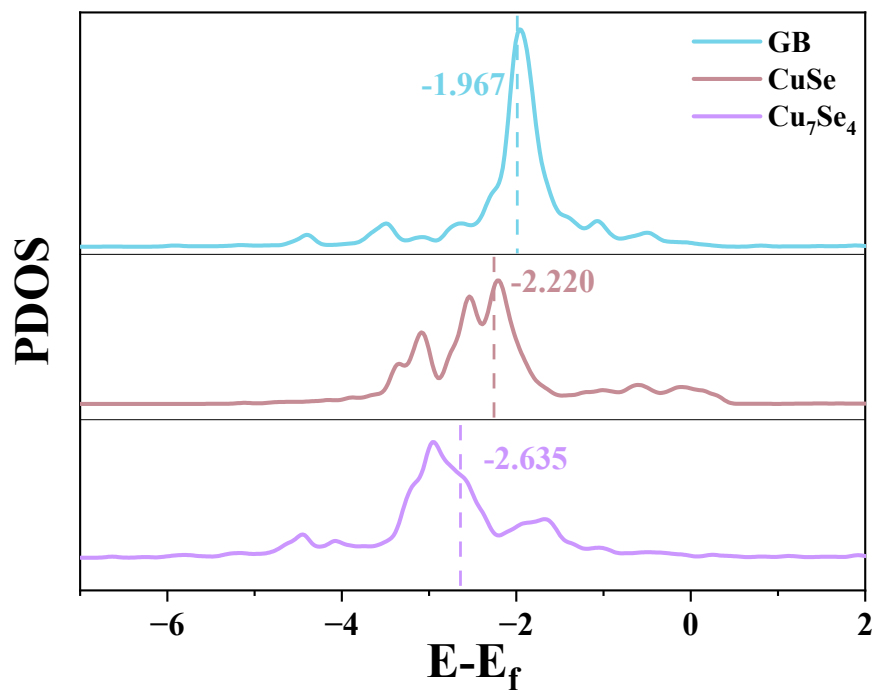

Fig. S15. Calculated d-projected density of states (PDOS) of surface Cu atoms on  $\text{CuSe}^3$ .



Tab. S1. EDX data of CuSe<sup>x</sup>.

| Sample            | Cu/at% | Se/at% |
|-------------------|--------|--------|
| CuSe <sup>1</sup> | 90.72  | 9.28   |
| CuSe <sup>2</sup> | 82.21  | 17.79  |
| CuSe <sup>3</sup> | 65.79  | 34.21  |
| CuSe <sup>4</sup> | 59.70  | 40.30  |
| CuSe <sup>5</sup> | 51.39  | 48.61  |

Tab. S2. Element content of Cu and Se from the total XPS spectra for CuSe<sup>x</sup>.

| Sample            | Se/at% | Cu/at% |
|-------------------|--------|--------|
| CuSe <sup>1</sup> | 30.82  | 69.18  |
| CuSe <sup>2</sup> | 38.19  | 61.81  |
| CuSe <sup>3</sup> | 41.68  | 58.32  |
| CuSe <sup>4</sup> | 48.94  | 51.06  |
| CuSe <sup>5</sup> | 56.66  | 43.34  |

Tab. S3. Distribution for Cu chemical states from the Cu 2p XPS spectra for CuSe<sup>X</sup>.

| Cu 2p             | 2P <sub>3/2</sub>                |                  | 2P <sub>1/2</sub>                |                  | (Cu <sup>+</sup> +Cu <sup>0</sup> )/Cu <sup>2+</sup> |
|-------------------|----------------------------------|------------------|----------------------------------|------------------|------------------------------------------------------|
|                   | Cu <sup>+</sup> /Cu <sup>0</sup> | Cu <sup>2+</sup> | Cu <sup>+</sup> /Cu <sup>0</sup> | Cu <sup>2+</sup> |                                                      |
| CuSe <sup>1</sup> | 42.61%                           | 21.41%           | 23.76%                           | 12.22%           | 1.97                                                 |
| CuSe <sup>2</sup> | 31.38%                           | 25.40%           | 36.63%                           | 6.59%            | 2.13                                                 |
| CuSe <sup>3</sup> | 45.35%                           | 20.11%           | 26.42%                           | 8.12%            | 2.54                                                 |
| CuSe <sup>4</sup> | 28.42%                           | 28.77%           | 35.09%                           | 7.72%            | 1.74                                                 |
| CuSe <sup>5</sup> | 25.50%                           | 40.18%           | 11.36%                           | 22.96%           | 0.58                                                 |

Tab. S4. The fitted results of EIS for CuSe<sup>X</sup>.

| Sample            | Rs   | 1-CPE-T | 1-CPE-P | Rct   | 2-CPE-T | 2-CPE-P | Rct     |
|-------------------|------|---------|---------|-------|---------|---------|---------|
| CuSe <sup>1</sup> | 0.15 | 7.76E-7 | 0.99    | 16.00 | 7.36E-3 | 0.46    | 697.80  |
| CuSe <sup>2</sup> | 0.26 | 6.09E-7 | 0.80    | 23.55 | 6.79E-3 | 0.61    | 1256.00 |
| CuSe <sup>3</sup> | 0.25 | 7.21E-7 | 0.83    | 21.18 | 7.30E-3 | 0.67    | 370.70  |
| CuSe <sup>4</sup> | 0.29 | 5.41E-7 | 0.84    | 22.32 | 2.02E-3 | 0.74    | 834.70  |
| CuSe <sup>5</sup> | 0.16 | 5.29E-7 | 0.85    | 18.99 | 3.47E-3 | 0.76    | 792.30  |

Tab. S5. Distribution for Cu chemical states from the Cu 2p XPS spectra and Cu LMM Auger spectra for CuSe<sup>3</sup>.

| Cu 2p             | 2P <sub>3/2</sub>                |                  | 2P <sub>1/2</sub>                |                  | (Cu <sup>+</sup> +Cu <sup>0</sup> )/Cu <sup>2+</sup> |
|-------------------|----------------------------------|------------------|----------------------------------|------------------|------------------------------------------------------|
|                   | Cu <sup>+</sup> /Cu <sup>0</sup> | Cu <sup>2+</sup> | Cu <sup>+</sup> /Cu <sup>0</sup> | Cu <sup>2+</sup> |                                                      |
| CuSe <sup>3</sup> | 43.64%                           | 18.96%           | 24.10%                           | 13.30%           | 2.10                                                 |

Tab. S6. Distribution for Cu chemical states from the Cu LMM Auger spectra for CuSe<sup>3</sup>.

|                   | Cu <sup>0</sup> | Cu <sup>+</sup> | Cu <sup>2+</sup> |
|-------------------|-----------------|-----------------|------------------|
| CuSe <sup>3</sup> | 19.48%          | 53.70%          | 26.82%           |
